# Supplementary material for: Contracts Adjustment under Bilateral Information Updating in a Supply Chain
Source: Hindawi journal article supplement (doi:10.1155/2020/1040658), 2020-02-25
Supplement: f1 [file 1040658.f1.docx]

**Proof of Lemma 1.**

If , the profits of the manufacturer and the retailer are

, (A.1)

. (A.2)

It is noted that . Thus, given a wholesale price, the retailer’s optimal response solves, i.e., . We have.It is noted that and . Let and we shall get the optimal wholesale price . We substitute in Eq. (A.2) to obtain .

If**,** the transfer payment made to the manufacturer is . The profits of the manufacturer and the retailer are as follows.

, (A.3)

. (A.4)

We can get that the optimal wholesale price is, and the optimal order quantity is .

**Proof of Proposition 1.**

Part (1). Since, we can get that when , holds. Because, we can get that when, holds. Let

and , Proposition 1 can be obtained.

**Lemma 2.** When, ; when , .

**Proof of Lemma 2**. When , ,

.

When , ,

.

**Proof of Proposition 2.**

**Proof of Part (1).** Under the case, when , is decreasing in . From Lemma 1, when , . So we can get that on the interval . When , the manufacturer sets her wholesale price , so. i.e., . When ,

. Since is decreasing in, when , holds. When , holds. However, according to the initial contract, the retailer has to choose the minimum order quantity.

**Proof of Part (2).** Similar to the Part (1), the difference is that on the interval, is always holds. This is because the information measure is larger than a lower bound, i.e., .

**Proof of** **Part (3)**. Since , according to Lemma 2, , somay holds. So we next give the threshold for. Since, so when , . It holds that. Thus, when, holds; when , holds. But according to the minimum committed order quantity, the retailer should not order less than. So when , the retailer has to choose . On the interval , since , the retailer also has to choose . Thus, on the interval , holds.

**Lemma 3.** , ; , ,

, .

**Proof of Lemma 3.** With the initial agreement, the manufacturer’s profit function is

.

After information updating and sharing, the manufacturer’s profit functions is

,

.

With the initial contract, the retailer’s profit function is

.

After information updating, the retailer’s profit functions are

.

After information updating, the supply chain profit functions are

**Proof of Proposition 3.**

**Proof of Part A.**

The value of information updating for the manufacturer can be expressed as

.

When, ; when , the retailer makes his order, . Thus, we have .

The value of information updating for the retailer can be expressed as

. Since when,holds, and when, (Proposition 2). Thus we have.

The value of information updating for supply chain can be expressed as

Since **, .**

**Proof of part B.**

When the wholesale price falls, the value of information updating for the manufacturer can be expressed as

Thus, when , holds.

when , define

.

Let , we obtain that when,

; When .

Since, thus we obtain that when holds. When holds. The value of information updating for the retailer can be expressed as

, when , ; when , . Thus we have always holds.

The value of information updating for supply chain can be expressed as

**.**

Since , holds.

**Proof of Proposition 4.**

By the definitions of the demand accuracy and production cost accuracy, the optimal wholesale price and order quantity under bilateral information updating can be written as

,

, ,

.

**Proof of Part (1).**

Since and, can be expressed as,. Thus, . For a realized signal , we have . is equivalent to , thus we obtain that holds for; holds for . Since and, we can obtain that when , and hold; When , and hold.

**Proof of Part (2)**

Since and, can be expressed as,. Thus,. For a realized signal , we have .is equivalent to , thus we obtain that holds for; holds for.Since,, So we can get that when, and ; when , and .

**Proof of Proposition 5.**

can be rewritten as . Thus, we have . By proposition 4 (When ,,), we have for . In as similar way, we also have for .

can be written as

Since (Proposition 4) , we have

,

,

.

Therefore, when,,,; , . When , ,,; , .

**Proof of Proposition 6.**

Since , the relationship between the accuracy of production cost and the manufacturer’s profit is as follows.

**.** It is relevant to the measure of market variation and production cost variation, we have the following four cases.

1. , . Under this case, (Proposition 2) and and (Proposition 4) hold. Thus, we have

.

1. , . Under this case, (Proposition 2) and and (Proposition 4) hold. Thus, we have

.

1. , . Under this case, (Proposition 2) and and (Proposition 4) hold. Thus, we have

.

1. , . Under this case, (Proposition 2) and and (Proposition 4) hold. Thus, we have

.

Since , the relationship between information accuracy of production cost and retailer’s profit is as follows.

. It is relevant to the measure of market variation and production cost variation, we have the following four cases

1. , . Under this case, (Proposition 2), thus, we have .
2. , . Under this case, (Proposition 2), thus, we have .
3. , . Under this case, (Proposition 2), thus, we have .
4. , . Under this case, (Proposition 2), thus we have .

Since(Lemma 3), the relationship between the accuracy of production cost and the retailer’s profit is as follows.

Thus, we have for ; for .

Since , we have

,

.

Therefore, we obtain that when , ,, . ,, .When , ,, . ,, .

**Proof of Proposition 7.**

Since , are not relevant to **, , ,**

, , and

, hold. Combining Proposition 5, we obtain that

When , ,,;

, .

(2) When , ,,; , .

**Proof of Proposition 8.**

Since , are not relevant to **, , ,**

, , and

, hold. Combining Proposition 6, we obtain that

When ,,,. , .

When, ,, ., .
